# Supplementary material for: Mechanism insights into the regulation of the LuxS/AI-2 quorum sensing system on the formation of viable but nonculturable state in biofilm cells of beer-spoilage Lactiplantibacillus plantarum
Source: Research Square preprint supplement (doi:10.21203/rs.3.rs-6435335/v1), 2025-04-15
Supplement: Supplementary file 1 [file ad80e78c8f9af0a9f154a69c.docx]

**Mechanism insights into the regulation of the LuxS/AI-2 quorum sensing system on the formation of viable but nonculturable state in biofilm cells of beer-spoilage *Lactiplantibacillus plantarum***

**Supplementary materials**

**
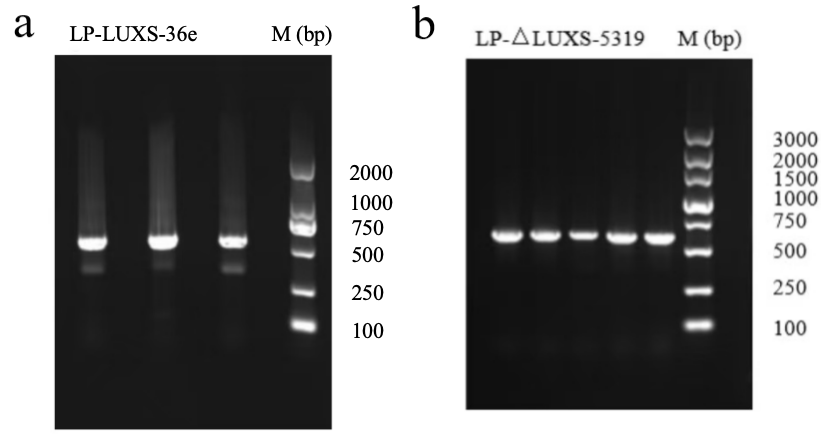
**

**Fig. S1** Agrose gel electrophoresis of PCR validation result of LP-LUXS-36e (a) and LP-△LUXS-5319 (b) strains using validation primer.


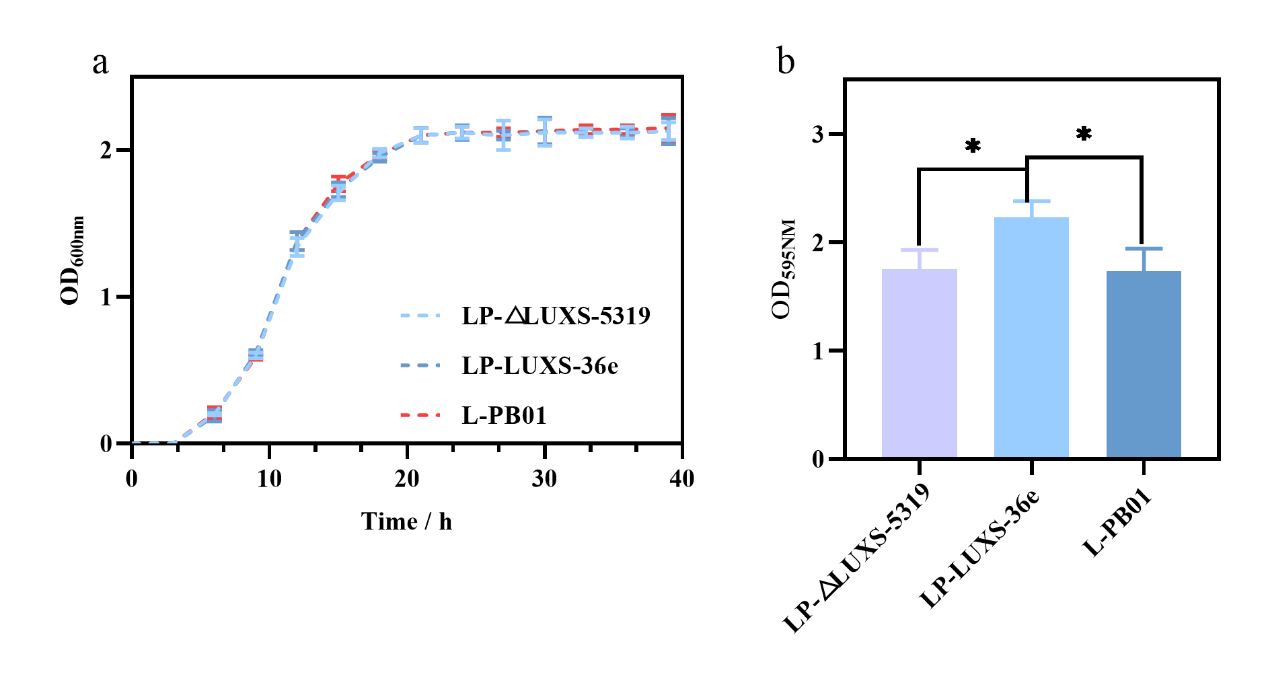


**Fig. S2** Growth curves of LP-LUXS-36e, LP-△LUXS-5319 and wild-type strains (a). Biofilm formation of LP-LUXS-36e, LP-△LUXS-5319 and wild-type strains (b). Data are presented as mean ± SEM. n ≥ 3. **p* < 0.05 compared with the control.


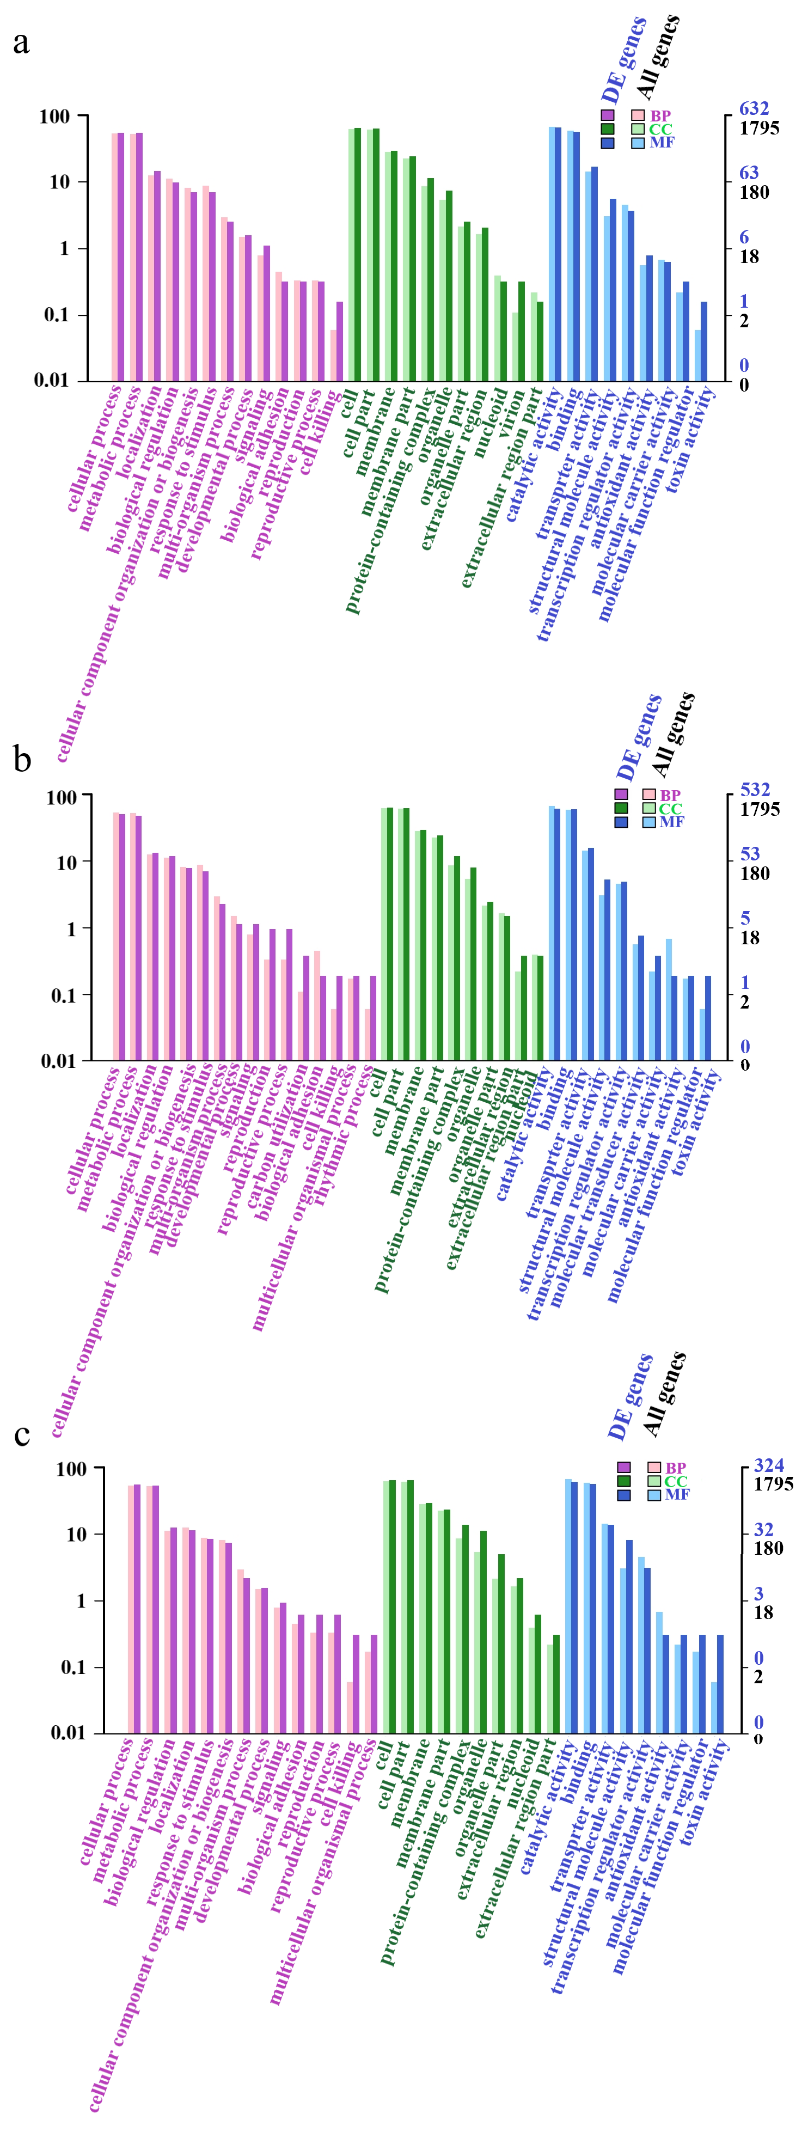


**Fig. S3 Bar chart of GO analysis.** (a) Normal state. (b) Biofilm state. (c) Biofilm VBNC state.


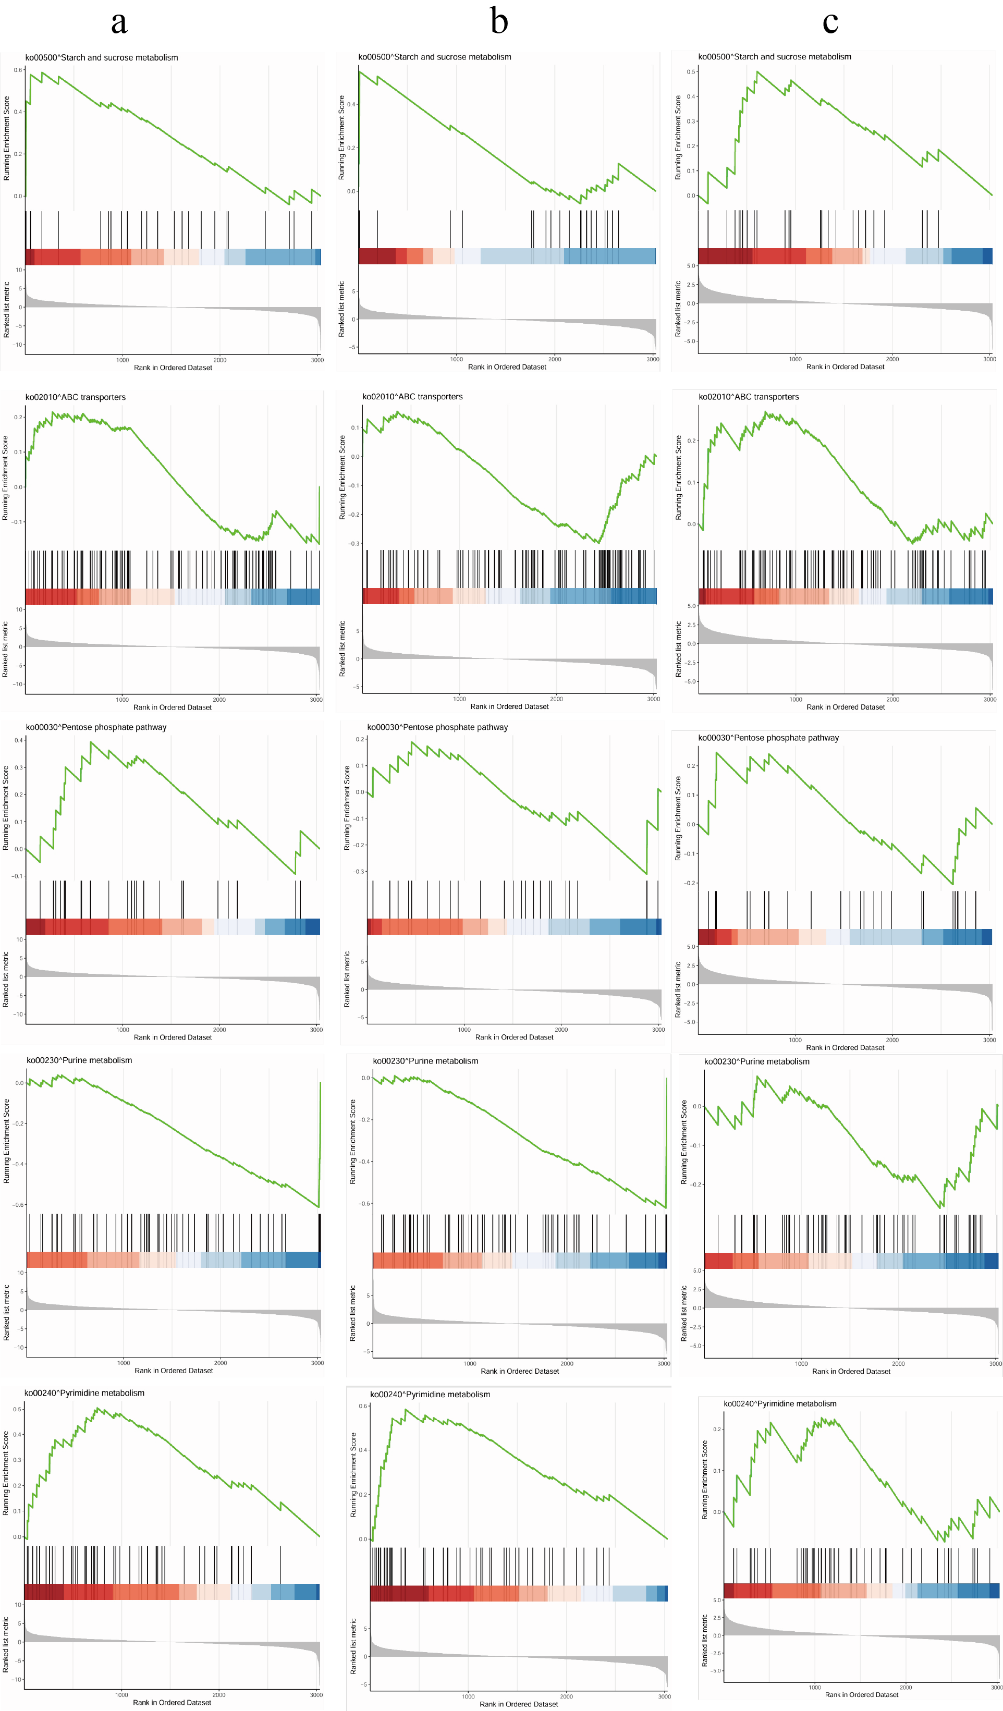


**Fig. S4 GSEA enrichment curves of KEGG pathways.** (a) Normal state. (b) Biofilm state. (c) Biofilm VBNC state.
